# Supplementary material
Source: Royal Society of Chemistry journal article supplement (doi:10.1039/d5fo02451j)

Fig.4D\_Fig.S1

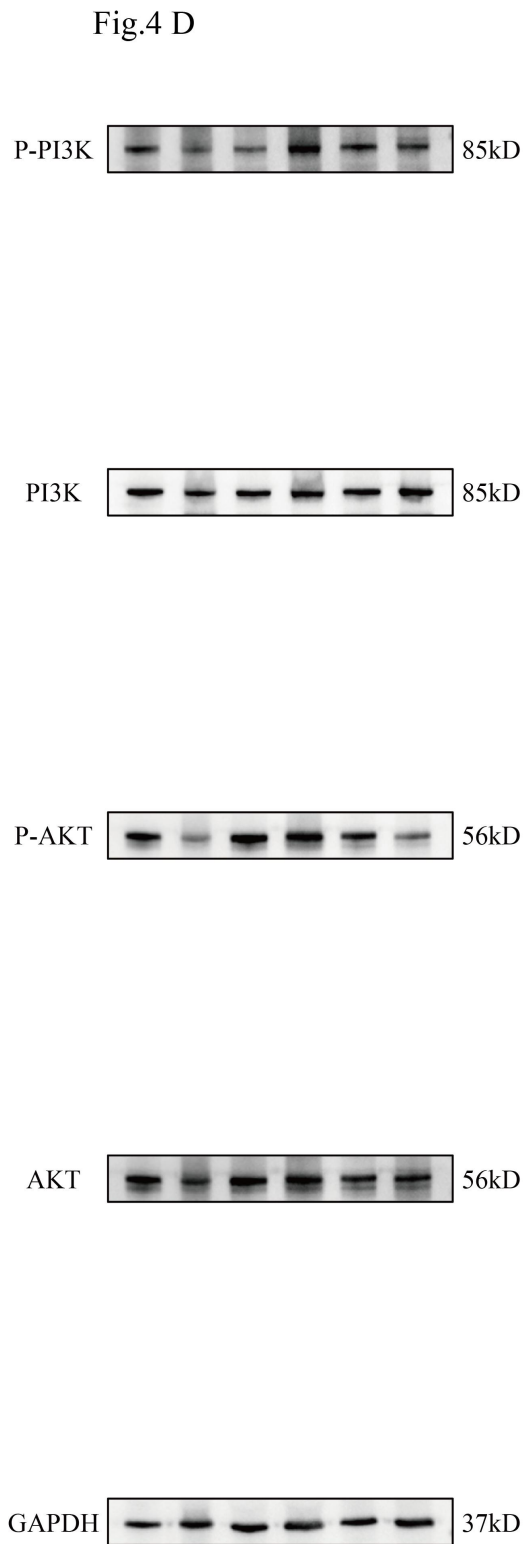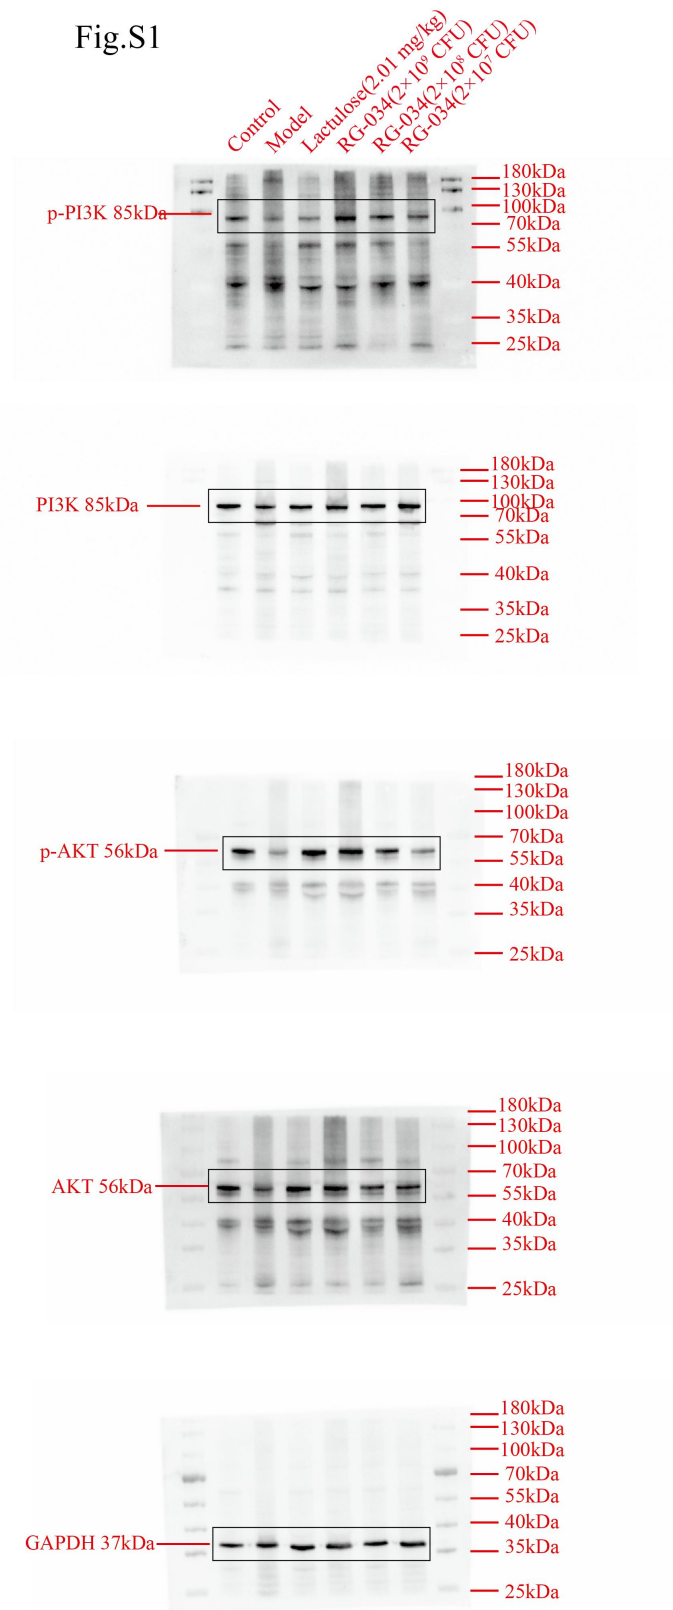

Fig.4 D\_Western Blot raw images

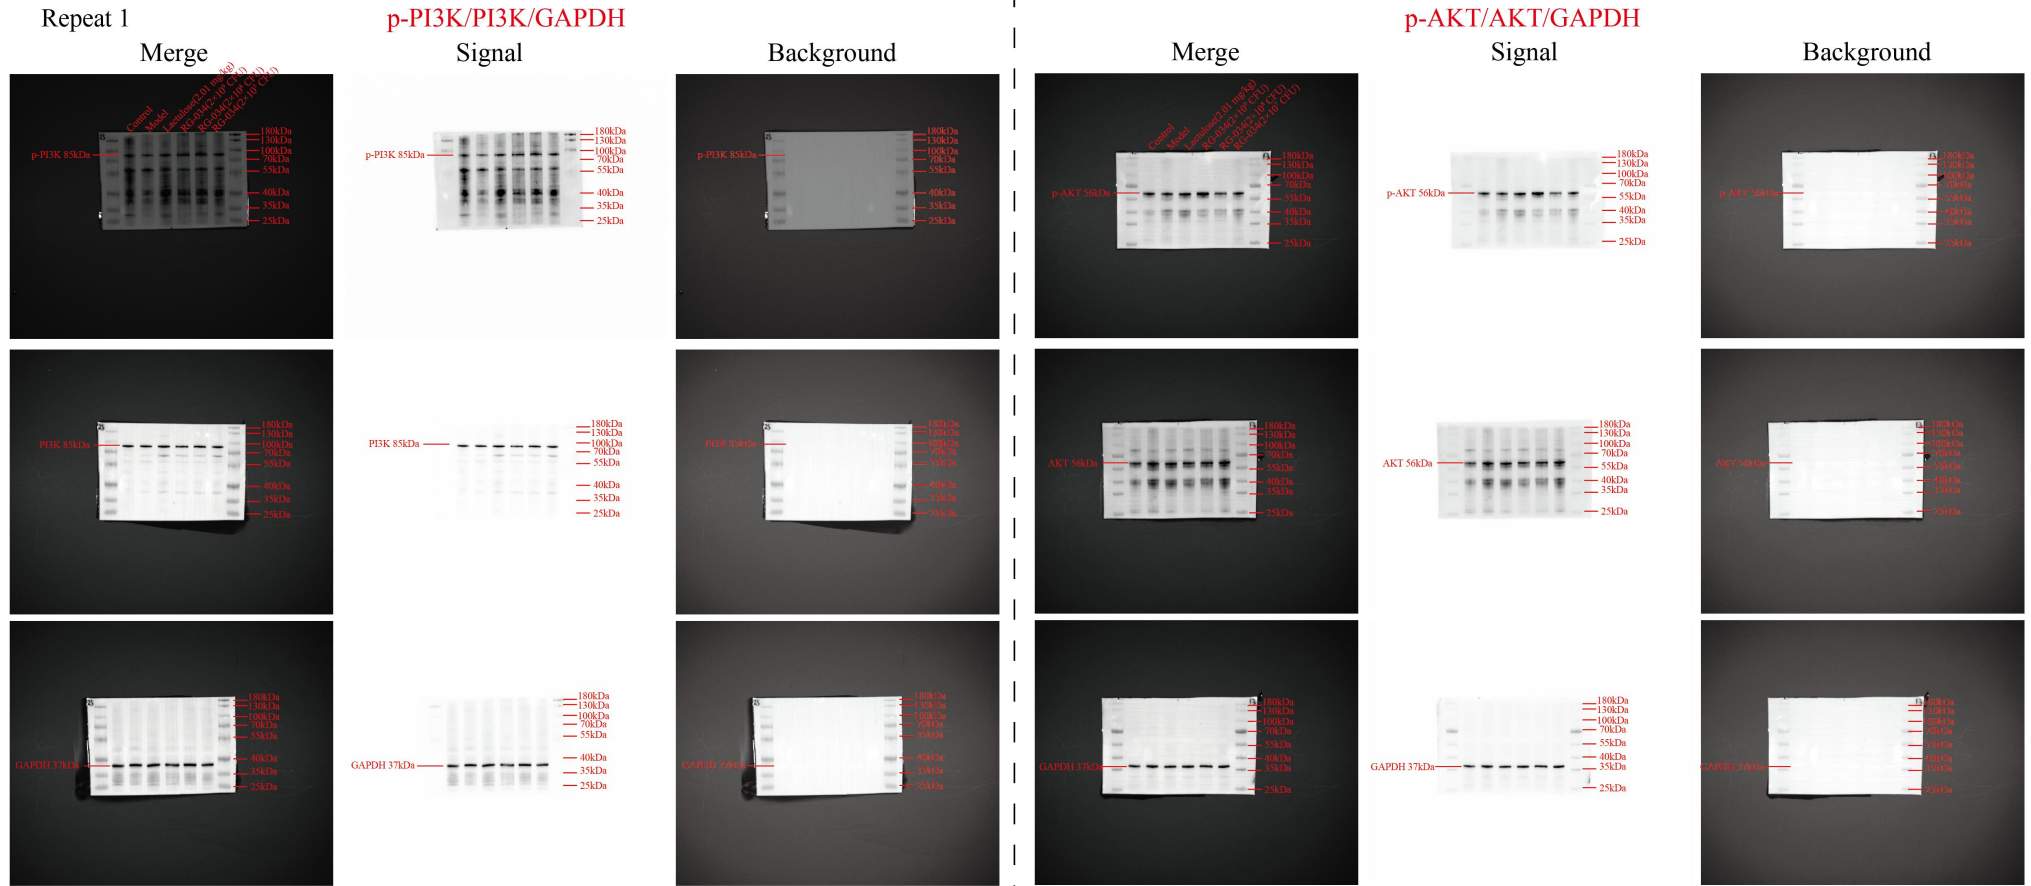







Fig.5 E\_Fig.S2

Fig.5 E

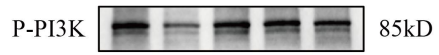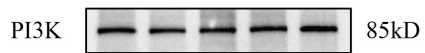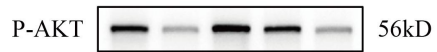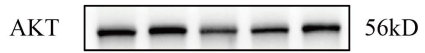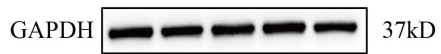

Fig.S2

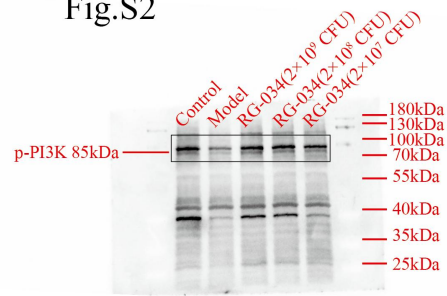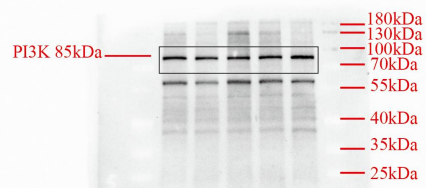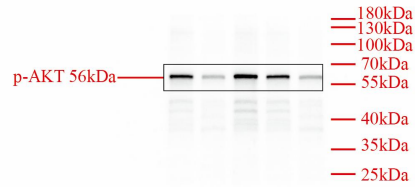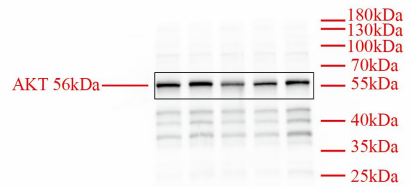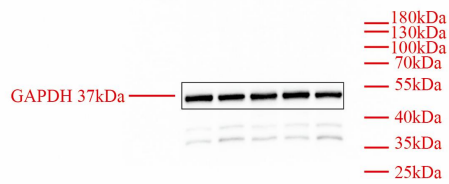



Repeat 2

Merge

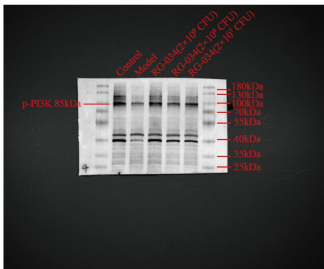

p-PI3K/PI3K/GAPDH  
Signal

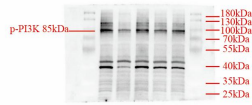

Background

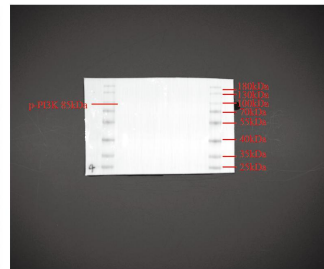

Merge

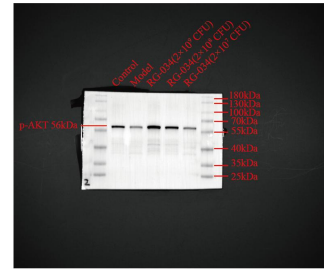

p-AKT/AKT/GAPDH  
Signal

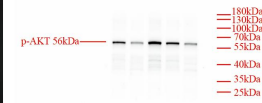

Background

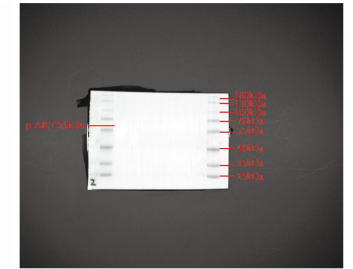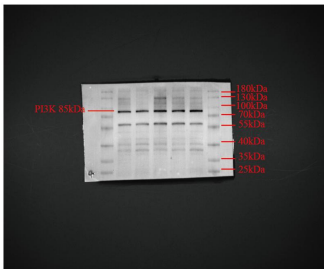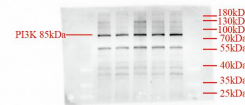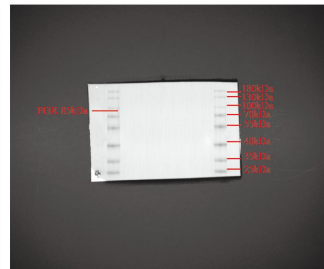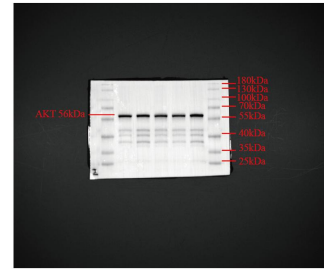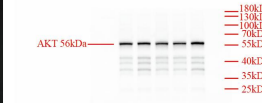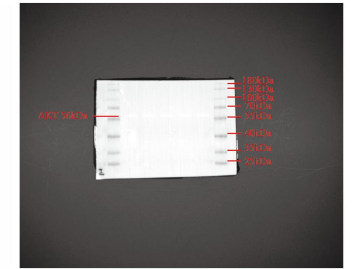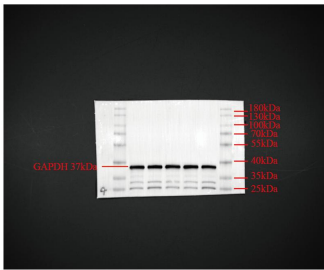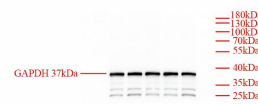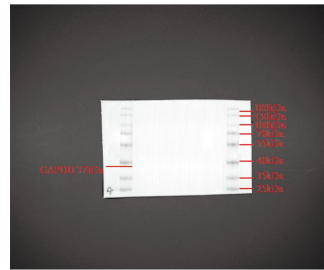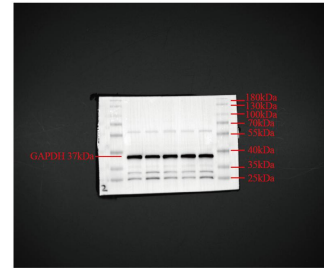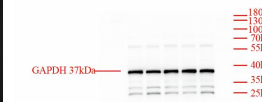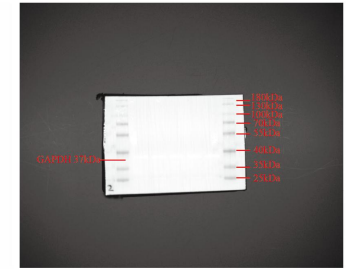

Repeat 3

Merge

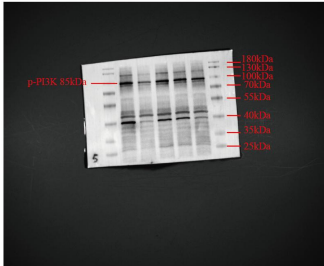

p-PI3K/PI3K/GAPDH

Signal

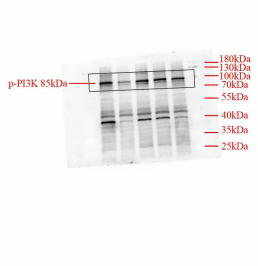

Background

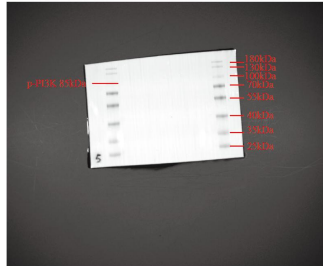

Merge

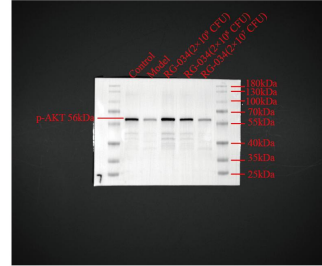

p-AKT/AKT/GAPDH

Signal

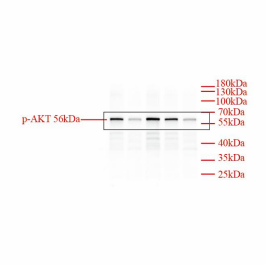

Background

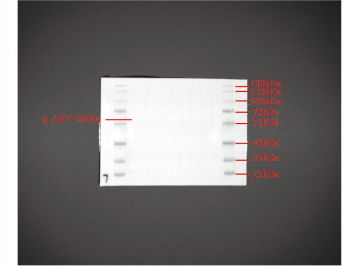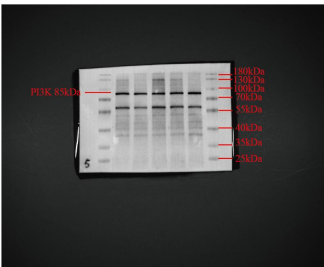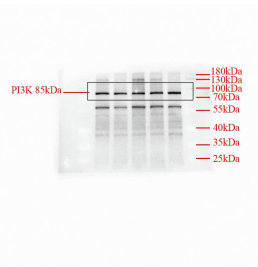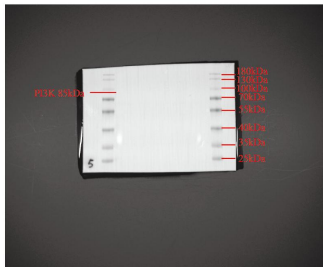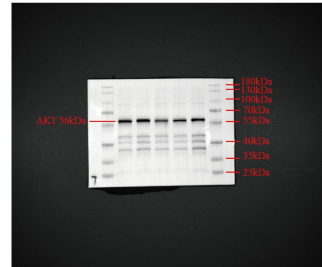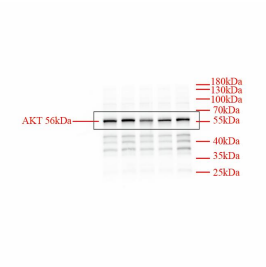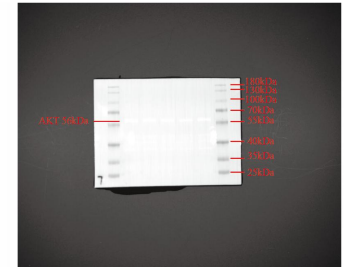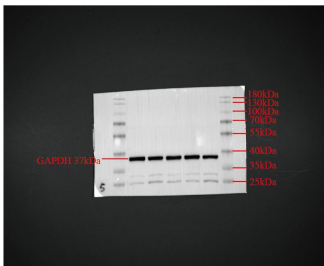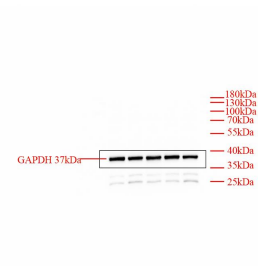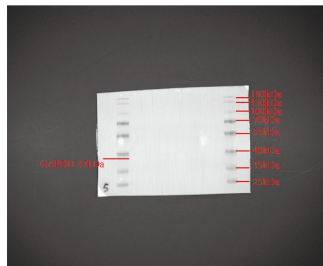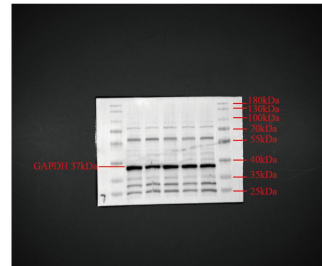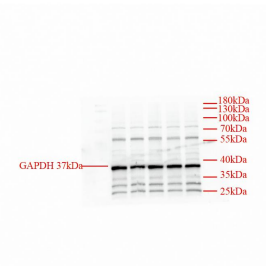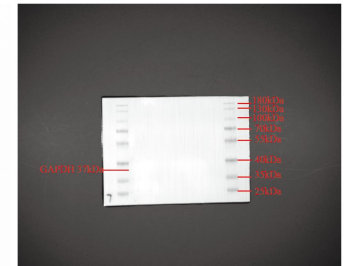

Supplement: d5fo02451j1.pdf [file d5fo02451j1.pdf]
